# Supplementary material for: Simple Disposable Odor Identification Tests for Predicting SARS-CoV-2 Positivity
Source: MDPI journal article supplement (doi:10.3390/ijerph181910185), 2021-09-28
Supplement: s1 [file s1]

## Supplementary materials

**Table S1.** The intergroup comparison of objective smell test results for all evaluated odors (Fisher's exact test).

|                       | Cases ( <i>n</i> = 64) | Controls ( <i>n</i> = 34) | Total ( <i>n</i> = 98) | <i>p</i> -Value |
|-----------------------|------------------------|---------------------------|------------------------|-----------------|
| <b>Detection</b>      |                        |                           |                        |                 |
| cinnamon              | 55 (85.9%)             | 34 (100%)                 | 89 (90.8%)             | 0.025           |
| mint                  | 52 (81.3%)             | 34 (100%)                 | 86 (87.8%)             | 0.007           |
| lemon                 | 52 (81.3%)             | 34 (100%)                 | 86 (87.8%)             | 0.007           |
| coffee                | 54 (84.4%)             | 34 (100%)                 | 88 (89.8%)             | 0.014           |
| clove                 | 54 (84.4%)             | 34 (100%)                 | 88 (89.8%)             | 0.014           |
| rose                  | 57 (89.1%)             | 34 (100%)                 | 91 (92.9%)             | 0.092           |
| anise                 | 55 (85.9%)             | 34 (100%)                 | 89 (90.8%)             | 0.025           |
| camphor               | 53 (82.8%)             | 34 (100%)                 | 87 (88.8%)             | 0.008           |
| alcohol               | 49 (76.6%)             | 34 (100%)                 | 83 (84.7%)             | 0.001           |
| <b>Identification</b> |                        |                           |                        |                 |
| cinnamon              | 39 (60.9%)             | 34 (100%)                 | 73 (74.5%)             | <0.001          |
| mint                  | 41 (64.1%)             | 34 (100%)                 | 75 (76.5%)             | <0.001          |
| lemon                 | 41 (64.1%)             | 33 (97.1%)                | 74 (75.5%)             | <0.001          |
| coffee                | 44 (68.8%)             | 31 (91.2%)                | 75 (76.5%)             | 0.013           |
| clove                 | 46 (71.9%)             | 33 (97.1%)                | 79 (80.6%)             | 0.002           |
| rose                  | 42 (65.6%)             | 29 (85.3%)                | 71 (72.4%)             | 0.056           |
| anise                 | 45 (70.3%)             | 33 (97.1%)                | 78 (79.6%)             | 0.001           |
| camphor               | 46 (71.9%)             | 33 (97.1%)                | 79 (80.6%)             | 0.002           |
| alcohol               | 34 (53.1%)             | 33 (97.1%)                | 67 (68.4%)             | <0.001          |

**Table S2.** Detailed correlations between self-reported OD and clinical characteristics of COVID-19 patients.

| Variable                                                                                              |              | Self-Reported OD                                       |                     |                    |                                                                      |                     |                    |
|-------------------------------------------------------------------------------------------------------|--------------|--------------------------------------------------------|---------------------|--------------------|----------------------------------------------------------------------|---------------------|--------------------|
|                                                                                                       |              | Presence of Self-Reported OD at the Time of the Survey |                     |                    | Presence of Self-Reported OD at Any Time since the Onset of COVID-19 |                     |                    |
|                                                                                                       |              | yes ( <i>N</i> = 21)                                   | no ( <i>N</i> = 43) | <i>p</i> -Value    | yes ( <i>N</i> = 27)                                                 | no ( <i>N</i> = 37) | <i>p</i> -Value    |
| Nasal congestion, <i>N</i> (%)                                                                        | yes          | 11 (52.4)                                              | 10 (23.3)           | 0.041 <sup>3</sup> | 14 (51.9)                                                            | 7 (18.9)            | 0.012 <sup>3</sup> |
|                                                                                                       | no           | 10 (47.6)                                              | 33 (76.7)           |                    | 13 (48.1)                                                            | 30 (81.1)           |                    |
| Rhinorrhea, <i>N</i> (%)                                                                              | yes          | 9 (42.9)                                               | 10 (23.3)           | 0.187 <sup>3</sup> | 14 (51.9)                                                            | 5 (13.5)            | 0.002 <sup>3</sup> |
|                                                                                                       | no           | 12 (57.1)                                              | 33 (76.7)           |                    | 13 (48.1)                                                            | 32 (86.5)           |                    |
| Presence of other symptoms at the time of the survey, <i>N</i> (%) <sup>1</sup>                       | yes          | 15 (71.4)                                              | 20 (46.5)           | 0.107 <sup>3</sup> | 17 (63)                                                              | 18 (48.6)           | 0.378 <sup>3</sup> |
|                                                                                                       | no           | 6 (28.6)                                               | 23 (53.5)           |                    | 10 (37)                                                              | 19 (51.4)           |                    |
| Presence of other symptoms since onset of COVID-19, <i>N</i> (%) <sup>2</sup>                         | yes          | 21 (100)                                               | 34 (79.1)           | 0.025 <sup>5</sup> | 27 (100)                                                             | 28 (75.7)           | 0.008 <sup>5</sup> |
|                                                                                                       | no           | 0 (0)                                                  | 9 (20.9)            |                    | 0 (0)                                                                | 9 (24.3)            |                    |
| Current smoking, <i>N</i> (%)                                                                         | yes          | 3 (14.3)                                               | 5 (11.6)            | 1 <sup>5</sup>     | 3 (11.1)                                                             | 5 (13.5)            | 1 <sup>5</sup>     |
|                                                                                                       | no           | 18 (85.7)                                              | 38 (88.4)           |                    | 24 (88.9)                                                            | 32 (86.5)           |                    |
| Former or current smoking, <i>N</i> (%)                                                               | yes          | 8 (38.1)                                               | 21 (48.8)           | 0.587 <sup>3</sup> | 8 (29.6)                                                             | 21 (56.8)           | 0.058 <sup>3</sup> |
|                                                                                                       | no           | 13 (61.9)                                              | 22 (51.2)           |                    | 19 (70.4)                                                            | 16 (43.2)           |                    |
| Death, <i>N</i> (%)                                                                                   | yes          | 2 (9.5)                                                | 6 (14)              | 1 <sup>5</sup>     | 2 (7.4)                                                              | 6 (16.2)            | 0.450 <sup>5</sup> |
|                                                                                                       | no           | 19 (90.5)                                              | 37 (86)             |                    | 25 (92.6)                                                            | 31 (83.8)           |                    |
| Need for oxygen therapy, <i>N</i> (%)                                                                 | yes          | 7 (33.3)                                               | 21 (48.8)           | 0.365 <sup>3</sup> | 7 (25.9)                                                             | 21 (56.8)           | 0.028 <sup>3</sup> |
|                                                                                                       | no           | 14 (66.7)                                              | 22 (51.2)           |                    | 20 (74.1)                                                            | 16 (43.2)           |                    |
| Need for ICU stay, <i>N</i> (%)                                                                       | yes          | 1 (4.8)                                                | 5 (11.6)            | 0.654 <sup>5</sup> | 1 (3.7)                                                              | 5 (13.5)            | 0.388 <sup>5</sup> |
|                                                                                                       | no           | 20 (95.2)                                              | 38 (88.4)           |                    | 26 (96.3)                                                            | 32 (86.5)           |                    |
| Need for invasive ventilation, <i>N</i> (%)                                                           | yes          | 1 (4.8)                                                | 4 (9.3)             | 1 <sup>5</sup>     | 1 (3.7)                                                              | 4 (10.8)            | 0.387 <sup>5</sup> |
|                                                                                                       | no           | 20 (95.2)                                              | 39 (90.7)           |                    | 26 (96.3)                                                            | 33 (89.2)           |                    |
| Number of other symptoms at the time of the survey                                                    | Mean ± SD    | 1.7 ± 1.6                                              | 1 ± 1.4             | 0.057 <sup>4</sup> | 1.4 ± 1.5                                                            | 1.1 ± 1.5           | 0.284 <sup>4</sup> |
|                                                                                                       | Median (IQR) | 1 (0–3)                                                | 0 (0–2)             |                    | 1 (0–2)                                                              | 0 (0–2)             |                    |
| Number of other symptoms since the onset of COVID-19                                                  | Mean ± SD    | 4.2 ± 2.2                                              | 2.9 ± 2.1           | 0.040 <sup>4</sup> | 4.2 ± 1.9                                                            | 2.73 ± 2.2          | 0.013 <sup>4</sup> |
|                                                                                                       | Median (IQR) | 4 (3–6)                                                | 3 (1–4)             |                    | 4 (3–5)                                                              | 3 (1–4)             |                    |
| Time interval between first positive PCR result and time of the survey, days                          | Mean ± SD    | 5.1 ± 4.2                                              | 7.6 ± 6.7           | 0.290 <sup>4</sup> | 6.7 ± 4.8                                                            | 7.1 ± 7             | 0.615 <sup>4</sup> |
|                                                                                                       | Median (IQR) | 3 (2–8)                                                | 6 (2–12)            |                    | 5 (2.5–12)                                                           | 4 (2–12)            |                    |
| Duration of infection (from first positive to first negative PCR result, excluding deceased patients) | <i>N</i>     | 19                                                     | 37                  | 0.134 <sup>4</sup> | 25                                                                   | 31                  | 0.014 <sup>4</sup> |
|                                                                                                       | Mean ± SD    | 17.47 ± 10.12                                          | 21.57 ± 13.14       |                    | 16.48 ± 9.12                                                         | 23.16 ± 13.73       |                    |
|                                                                                                       | Median (IQR) | 13 (10–21.5)                                           | 16 (14–26)          |                    | 12 (11–17)                                                           | 18 (14–28.5)        |                    |
| Duration of hospitalisation (excluding deceased                                                       | <i>N</i>     | 19                                                     | 37                  | 0.862 <sup>4</sup> | 25                                                                   | 31                  | 0.060 <sup>4</sup> |

|                                      |              |              |              |                    |              |               |                    |
|--------------------------------------|--------------|--------------|--------------|--------------------|--------------|---------------|--------------------|
| patients)                            | Mean ± SD    | 19 ± 10.64   | 20.68 ± 14.2 |                    | 16.56 ± 10.5 | 22.97 ± 14.28 |                    |
|                                      | Median (IQR) | 17 (12–23.5) | 18 (10–24)   |                    | 13 (10–19)   | 18 (15–28)    |                    |
| MEWS score at the time of the survey | Mean ± SD    | 0.86 ± 1.28  | 0.86 ± 1.67  | 0.837 <sup>4</sup> | 0.67 ± 1.18  | 1 ± 1.76      | 0.254 <sup>4</sup> |
|                                      | Median (IQR) | 0 (0–1)      | 0 (0–1)      |                    | 0 (0–1)      | 1 (0–1)       |                    |
| Avarage MEWS score                   | Mean ± SD    | 0.86 ± 1.49  | 0.98 ± 1.32  | 0.481 <sup>4</sup> | 0.7 ± 1.35   | 1.11 ± 1.37   | 0.081 <sup>4</sup> |
|                                      | Median (IQR) | 0 (0–1)      | 1 (0–1)      |                    | 0 (0–1)      | 1 (0–2)       |                    |

<sup>1</sup> including: fatigue—22 (34.4%), cough—15 (23.4%), fever—2 (3.1%), headache—6 (9.4%), gastrointestinal complaints—14 (21.9%), nasal congestion—5 (7.8%), rhinorrhea—5 (7.8%), chills—2 (3.1%), dyspnea—7 (10.9%). <sup>2</sup> including: fatigue—45 (70.3%), cough—25 (39.1%), fever—24 (37.5%), headache—23 (35.9%), gastrointestinal complaints—23 (35.9%), nasal congestion—21 (32.8%), rhinorrhea—19 (29.7%), chills—18 (28.1%), dyspnea—15 (23.4%). <sup>3</sup> chi-squared test. <sup>4</sup> Mann-Whitney test, <sup>5</sup> Fisher test.

**Table S3.** Detailed correlations between objective OD (according to SDOIT) and quantitative clinical characteristics of COVID-19 patients; Mann-Whitney test.

| Variable                                             |                 | SDOIT, % of Correct Answers |                  |              |                     |              |                     |              |                   |
|------------------------------------------------------|-----------------|-----------------------------|------------------|--------------|---------------------|--------------|---------------------|--------------|-------------------|
|                                                      |                 | 10-SDOIT                    |                  | 9-SDOIT      |                     | 8-SDOIT      |                     | 4-SDOIT      |                   |
|                                                      |                 | Mean ± SD                   | Median (IQR)     | Mean ± SD    | Median (IQR)        | Mean ± SD    | Median (IQR)        | Mean ± SD    | Median (IQR)      |
| Nasal congestion                                     | yes             | 72.9 ± 30.4                 | 90<br>(50–100)   | 72 ± 33.5    | 88.9<br>(55.6–100)  | 71.4 ± 33.1  | 87.5<br>(50–100)    | 70.2 ± 40    | 100<br>(25–100)   |
|                                                      | no              | 63 ± 32.3                   | 70<br>(45–90)    | 62.5 ± 34.6  | 77.8<br>(44.4–88.9) | 62.8 ± 34.9  | 75<br>(37.5–87.5)   | 55.8 ± 38.1  | 75<br>(25–87.5)   |
|                                                      | <i>p</i> -value | 0.188                       |                  | 0.197        |                     | 0.240        |                     | 0.081        |                   |
| Rhinorrhea                                           | yes             | 73.7 ± 30.4                 | 90<br>(50–100)   | 73.1 ± 32.4  | 88.9<br>(56–100)    | 73.3 ± 32.1  | 87.5<br>(56.3–100)  | 69.7 ± 37.8  | 100<br>(37.5–100) |
|                                                      | no              | 63.1 ± 32.2                 | 80<br>(40–90)    | 62.5 ± 34.9  | 77.8<br>(44.4–88.9) | 62.5 ± 35.1  | 75<br>(37.5–87.5)   | 56.7 ± 39.3  | 75<br>(25–100)    |
|                                                      | <i>p</i> -value | 0.110                       |                  | 0.152        |                     | 0.179        |                     | 0.153        |                   |
| Presence of other symptoms at the time of the survey | yes             | 60 ± 31.2                   | 60<br>(40–90)    | 59.8 ± 33.9  | 66.7<br>(38.9–88.9) | 60 ± 33.3    | 62.5<br>(37.5–87.5) | 55 ± 37.3    | 50<br>(25–87.5)   |
|                                                      | no              | 73.8 ± 31.3                 | 90<br>(50–100)   | 73.2 ± 33.8  | 88.9<br>(55.6–100)  | 72.4 ± 34.8  | 87.5<br>(50–100)    | 67.2 ± 40.7  | 75<br>(25–100)    |
|                                                      | <i>p</i> -value | <b>0.032</b>                |                  | <b>0.042</b> |                     | <b>0.042</b> |                     | 0.139        |                   |
| Presence of other symptoms since onset of COVID-19   | yes             | 66.7 ± 32.4                 | 80<br>(50–90)    | 66.1 ± 35.2  | 77.8<br>(55.6–88.9) | 66.4 ± 34.9  | 75<br>(50–93.8)     | 62.3 ± 39.1  | 75<br>(25–100)    |
|                                                      | no              | 63.3 ± 29.2                 | 50<br>(40–90)    | 63 ± 29.4    | 55.6<br>(44.4–88.9) | 61.1 ± 31.5  | 62.5<br>(37.5–87.5) | 50 ± 39.5    | 50<br>(25–75)     |
|                                                      | <i>p</i> -value | 0.711                       |                  | 0.617        |                     | 0.576        |                     | 0.368        |                   |
| Current smoking                                      | yes             | 70 ± 31.2                   | 85<br>(55–90)    | 68.1 ± 35.9  | 83.3<br>(50–91.7)   | 68.8 ± 34.7  | 81.3<br>(56.4–90.6) | 65.6 ± 37.7  | 75<br>(43.8–100)  |
|                                                      | no              | 65.7 ± 32.1                 | 80<br>(47.5–90)  | 65.3 ± 34.4  | 77.8<br>(44.4–88.9) | 65.2 ± 34.5  | 75<br>(37.5–90.6)   | 59.8 ± 39.5  | 75<br>(25–100)    |
|                                                      | <i>p</i> -value | 0.806                       |                  | 0.837        |                     | 0.829        |                     | 0.745        |                   |
| Former or current smoking                            | yes             | 63.1 ± 30.7                 | 80<br>(40–90)    | 62.8 ± 32.8  | 77.8<br>(44.4–88.9) | 62.9 ± 32.8  | 75<br>(37.5–87.5)   | 55.2 ± 40.3  | 75<br>(25–100)    |
|                                                      | no              | 68.9 ± 32.9                 | 80<br>(50–100)   | 67.9 ± 35.7  | 77.8<br>(55.6–100)  | 67.9 ± 35.8  | 75<br>(56.3–100)    | 65 ± 38      | 75<br>(37.5–100)  |
|                                                      | <i>p</i> -value | 0.241                       |                  | 0.259        |                     | 0.308        |                     | 0.335        |                   |
| Death                                                | yes             | 51.2 ± 22.3                 | 60<br>(55–60)    | 50 ± 21.4    | 55.6<br>(52.8–58.3) | 51.6 ± 23.6  | 62.5<br>(46.9–62.5) | 40.6 ± 29.7  | 37.5<br>(25–50)   |
|                                                      | no              | 68.4 ± 32.5                 | 8<br>(47.5–90)   | 67.9 ± 35.3  | 88.9<br>(44.4–100)  | 67.6 ± 35.3  | 87.5<br>(37.5–100)  | 63.4 ± 39.6  | 75 (25–100)       |
|                                                      | <i>p</i> -value | 0.066                       |                  | <b>0.048</b> |                     | <b>0.047</b> |                     | 0.108        |                   |
| Need for oxygen therapy                              | yes             | 58.9 ± 30.6                 | 6<br>(47.5–80)   | 58.3 ± 32.3  | 61.1<br>(52.8–80.6) | 58.9 ± 32.4  | 62.5<br>(46.9–78.1) | 49.1 ± 35.7  | 50<br>(18.8–75)   |
|                                                      | no              | 71.9 ± 32                   | 90<br>(47.5–100) | 71.3 ± 35.2  | 88.9<br>(44.4–100)  | 70.8 ± 35.2  | 87.5<br>(37.5–100)  | 69.4 ± 39.7  | 100<br>(25–100)   |
|                                                      | <i>p</i> -value | <b>0.032</b>                |                  | <b>0.026</b> |                     | <b>0.035</b> |                     | <b>0.013</b> |                   |
| Need for ICU stay                                    | yes             | 68.3 ± 16                   | 60<br>(60–67.5)  | 66.7 ± 17.2  | 61.1<br>(55.6–66.7) | 68.8 ± 17.2  | 62.5<br>(62.5–71.9) | 58.3 ± 34.2  | 50<br>(31.3–87.5) |
|                                                      | no              | 66 ± 33.1                   | 80<br>(40–90)    | 65.5 ± 35.7  | 77.8<br>(44.4–88.9) | 65.3 ± 35.7  | 75<br>(37.5–96.9)   | 60.8 ± 39.8  | 75<br>(25–100)    |
|                                                      | <i>p</i> -value | 0.852                       |                  | 0.700        |                     | 0.682        |                     | 0.877        |                   |
| Need for invasive ventilation                        | yes             | 62 ± 4.5                    | 60<br>(60–60)    | 60 ± 6.09    | 55.6<br>(55.6–66.7) | 62.5 ± 8.8   | 62.5<br>(62.5–62.5) | 50 ± 30.6    | 50<br>(25–50)     |
|                                                      | no              | 66.9 ± 33.3                 | 80<br>(40–90)    | 66.3 ± 35.9  | 83.3<br>(44.4–97.2) | 65.9 ± 35.7  | 75<br>(37.5–100)    | 61.6 ± 40.1  | 75<br>(25–100)    |

|                 |       |       |       |       |
|-----------------|-------|-------|-------|-------|
| <i>p</i> -value | 0.355 | 0.278 | 0.292 | 0.485 |
|-----------------|-------|-------|-------|-------|

**Table S4.** Detailed correlations between objective OD (according to SDOIT) and qualitative clinical characteristics of COVID-19 patients; Spearman correlation.

| Variable                                                                              |                 | SDOIT    |         |         |         |
|---------------------------------------------------------------------------------------|-----------------|----------|---------|---------|---------|
|                                                                                       |                 | 10-SDOIT | 9-SDOIT | 8-SDOIT | 4-SDOIT |
| Number of other symptoms at the time of the survey                                    | q               | -0.28    | -0.27   | -0.27   | -0.19   |
|                                                                                       | <i>p</i> -value | 0.024    | 0.031   | 0.033   | 0.142   |
| Number of other symptoms since the onset of COVID-19                                  | q               | 0.06     | 0.07    | 0.09    | 0.14    |
|                                                                                       | <i>p</i> -value | 0.613    | 0.575   | 0.486   | 0.287   |
| Time interval between first positive PCR result and time of the survey, days          | q               | 0.19     | 0.18    | 0.19    | 0.1     |
|                                                                                       | <i>p</i> -value | 0.123    | 0.163   | 0.141   | 0.447   |
| Duration of infection (from first positive to first negative PCR, excluding deceased) | q               | -0.15    | -0.14   | -0.14   | -0.11   |
|                                                                                       | <i>p</i> -value | 0.265    | 0.294   | 0.319   | 0.422   |
| Duration of hospitalisation (excluding deceased)                                      | q               | -0.43    | -0.42   | -0.41   | -0.36   |
|                                                                                       | <i>p</i> -value | <0.001   | 0.002   | 0.002   | 0.007   |
| MEWS score at the time of the survey                                                  | q               | -0.29    | -0.32   | -0.32   | -0.25   |
|                                                                                       | <i>p</i> -value | 0.02     | 0.011   | 0.011   | 0.043   |
| Average MEWS score                                                                    | q               | -0.29    | -0.3    | -0.29   | -0.24   |
|                                                                                       | <i>p</i> -value | 0.02     | 0.016   | 0.018   | 0.054   |

**Table S5.** Correlations between self-reported OD and general characteristics of the entire cohort (cases and controls, *N* = 64).

| Variable                  |              | Self-Reported OD                                       |                     |                    |                                                                      |                     |                    |
|---------------------------|--------------|--------------------------------------------------------|---------------------|--------------------|----------------------------------------------------------------------|---------------------|--------------------|
|                           |              | Presence of Self-Reported OD at the Time of the Survey |                     |                    | Presence of Self-Reported OD at Any Time since the Onset of COVID-19 |                     |                    |
|                           |              | Yes ( <i>N</i> = 21)                                   | No ( <i>N</i> = 43) | <i>p</i> -Value    | Yes ( <i>N</i> = 27)                                                 | No ( <i>N</i> = 37) | <i>p</i> -Value    |
| Age                       | Mean ± SD    | 55.1 ± 21.5                                            | 46.5 ± 17.7         | 0.395 <sup>1</sup> | 47.6 ± 23.7                                                          | 48.6 ± 16.7         | 0.583 <sup>1</sup> |
|                           | Median (IQR) | 57 (34–72)                                             | 45 (32–60)          |                    | 45 (24–69.5)                                                         | 47 (34–62.5)        |                    |
| Gender, <i>N</i> (%)      | female       | 14 (66.7)                                              | 41 (53.2)           | 0.842 <sup>2</sup> | 15 (55.6)                                                            | 40 (56.3)           | 1 <sup>2</sup>     |
|                           | male         | 7 (33.3)                                               | 36 (46.8)           |                    | 12 (44.4)                                                            | 31 (43.7)           |                    |
| Current smoking           | yes          | 3 (14.3)                                               | 5 (11.6)            | 1 <sup>3</sup>     | 3 (11.1)                                                             | 5 (13.5)            | 1 <sup>3</sup>     |
|                           | no           | 18 (85.7)                                              | 38 (88.4)           |                    | 24 (88.9)                                                            | 32 (86.5)           |                    |
| Current or former smoking | yes          | 8 (38.1)                                               | 21 (48.8)           | 0.587 <sup>1</sup> | 8 (29.6)                                                             | 21 (56.8)           | 0.058 <sup>1</sup> |
|                           | no           | 13 (61.9)                                              | 22 (51.2)           |                    | 19 (70.4)                                                            | 15 (43.2)           |                    |

<sup>1</sup>Mann-Whitney test, <sup>2</sup>chi-squared test, <sup>3</sup>Fisher test

**Table S6.** Correlations between gender and objective OD (according to SDOIT) of the entire cohort (cases and controls, *N* = 64); Mann-Whitney test.

| Variable |                 | SDOIT, % of Correct Answers |              |                 |                 |                 |                 |              |              |
|----------|-----------------|-----------------------------|--------------|-----------------|-----------------|-----------------|-----------------|--------------|--------------|
|          |                 | 10-SDOIT                    |              | 9-SDOIT         |                 | 8-SDOIT         |                 | 4-SDOIT      |              |
| Gender   | female          | Mean ± SD                   | Median (IQR) | Mean ± SD       | Median (IQR)    | Mean ± SD       | Median (IQR)    | Mean ± SD    | Median (IQR) |
|          | male            | 77.9 ± 30.4                 | 90 (55–100)  | 74.8 ± 32.4     | 77.8 ± 30.6     | 75.3 ± 33.8     | 78.1 ± 30.9     | 73.6 ± 36.8  | 73.8 ± 36.6  |
|          | <i>p</i> -value | 78.4 ± 28.9                 | 90 (75–100)  | 88.9 (55.6–100) | 88.9 (72.2–100) | 85.7 (71.4–100) | 85.7 (71.4–100) | 100 (50–100) | 100 (50–100) |
|          |                 | 0.641                       |              | 0.676           |                 | 0.822           |                 | 0.978        |              |

**Table S7.** Detailed results of the ROC analysis.

| Classifier                                            | Sensitivity               | Specificity               | PPV                       | NPV                       | AUC                       |
|-------------------------------------------------------|---------------------------|---------------------------|---------------------------|---------------------------|---------------------------|
| Self-reported OD at the time of the survey            | 0.33<br>(CI95% 0.22–0.45) | 1<br>(CI95% 1–1)          | 1<br>(CI95% 1–1)          | 0.44<br>(CI95% 0.4–0.49)  | 0.66<br>(CI95% 0.61–0.72) |
| Self-reported OD at the time of maximum deterioration | 0.42<br>(CI95% 0.3–0.55)  | 1<br>(CI95% 1–1)          | 1<br>(CI95% 1–1)          | 0.48<br>(CI95% 0.43–0.54) | 0.71<br>(CI95% 0.65–0.77) |
| Maximum VAS                                           | 0.64<br>(CI95% 0.53–0.75) | 1<br>(CI95% 1–1)          | 1<br>(CI95% 1–1)          | 0.6<br>(CI95% 0.53–0.68)  | 0.82<br>(CI95% 0.76–0.88) |
| 10-SDOIT (cut-off at 95% - OD ≥ 1 incorrect)          | 0.8<br>(CI95% 0.56–0.78)  | 0.71<br>(CI95% 0.62–0.76) | 0.84<br>(CI95% 0.79–0.86) | 0.65<br>(CI95% 0.52–0.77) | 0.82<br>(CI95% 0.74–0.9)  |
| 10-SDOIT (OD ≥ 1 incorrect) + self-                   | 0.91<br>(CI95% 0.83–0.97) | 0.71<br>(CI95% 0.56–0.85) | 0.85<br>(CI95% 0.79–0.92) | 0.8<br>(CI95% 0.67–0.93)  | 0.87<br>(CI95% 0.8–0.93)  |

|                                                              |                           |                           |                           |                           |                           |
|--------------------------------------------------------------|---------------------------|---------------------------|---------------------------|---------------------------|---------------------------|
| reported OD                                                  |                           |                           |                           |                           |                           |
| 10-SDOIT<br>(OD $\geq 2$ incorrect)                          | 0.59<br>(CI95% 0.47–0.72) | 0.91<br>(CI95% 0.82–1)    | 0.93<br>(CI95% 0.85–1)    | 0.54<br>(CI95% 0.47–0.63) | 0.75<br>(CI95% 0.68–0.83) |
| 10-SDOIT<br>(OD OD $\geq 2$ incorrect) +<br>self-reported OD | 0.77<br>(CI95% 0.66–0.86) | 0.91<br>(CI95% 0.82–1)    | 0.94<br>(CI95% 0.88–1)    | 0.67<br>(CI95% 0.58–0.78) | 0.86<br>(CI95% 0.80–0.92) |
| 9-SDOIT<br>(cut-off at 94% - OD $\geq 1$<br>incorrect)       | 0.77<br>(CI95% 0.55–0.86) | 0.71<br>(CI95% 0.59–0.97) | 0.83<br>(CI95% 0.77–0.97) | 0.62<br>(CI95% 0.5–0.74)  | 0.80<br>(CI95% 0.73–0.88) |
| 9-SDOIT<br>(OD $\geq 1$ incorrect) + self-<br>reported OD    | 0.88<br>(CI95% 0.83–0.97) | 0.71<br>(CI95% 0.56–0.85) | 0.85<br>(CI95% 0.79–0.92) | 0.75<br>(CI95% 0.68–0.93) | 0.85<br>(CI95% 0.79–0.92) |
| 9-SDOIT<br>(OD $\geq 2$ incorrect)                           | 0.55<br>(CI95% 0.42–0.67) | 0.94<br>(CI95% 0.85–1)    | 0.95<br>(CI95% 0.87–1)    | 0.52<br>(CI95% 0.46–0.6)  | 0.74<br>(CI95% 0.67–0.82) |
| 9-SDOIT<br>(OD OD $\geq 2$ incorrect) +<br>self-reported OD  | 0.73<br>(CI95% 0.83–0.97) | 0.94<br>(CI95% 0.56–0.85) | 0.96<br>(CI95% 0.79–0.92) | 0.65<br>(CI95% 0.67–0.93) | 0.85<br>(CI95% 0.79–0.91) |
| 8-SDOIT<br>(cut-off at 94% - OD $\geq 1$<br>incorrect)       | 0.75<br>(CI95% 0.61–0.86) | 0.79<br>(CI95% 0.68–0.94) | 0.87<br>(CI95% 0.81–0.96) | 0.63<br>(CI95% 0.53–0.74) | 0.82<br>(CI95% 0.75–0.89) |
| 8-SDOIT<br>(OD $\geq 1$ incorrect) + self-<br>reported OD    | 0.86<br>(CI95% 0.77–0.94) | 0.79<br>(CI95% 0.65–0.91) | 0.89<br>(CI95% 0.82–0.95) | 0.75<br>(CI95% 0.64–0.88) | 0.87<br>(CI95% 0.81–0.93) |
| 8-SDOIT<br>(OD $\geq 2$ incorrect)                           | 0.55<br>(CI95% 0.42–0.67) | 0.97<br>(CI95% 0.91–1)    | 0.97<br>(CI95% 0.91–1)    | 0.53<br>(CI95% 0.47–0.61) | 0.76<br>(CI95% 0.69–0.83) |
| 8-SDOIT<br>(OD OD $\geq 2$ incorrect) +<br>self-reported OD  | 0.73<br>(CI95% 0.62–0.84) | 0.97<br>(CI95% 0.91–1)    | 0.98<br>(CI95% 0.93–1)    | 0.66<br>(CI95% 0.58–0.76) | 0.86<br>(CI95% 0.8–0.92)  |
| 4-SDOIT<br>(cut-off at 88% - $\geq 1$<br>incorrect)          | 0.64<br>(CI95% 0.53–0.75) | 0.94<br>(CI95% 0.85–1)    | 0.95<br>(CI95% 0.89–1)    | 0.58<br>(CI95% 0.51–0.67) | 0.80<br>(CI95% 0.74–0.87) |
| 4-SDOIT<br>(OD $\geq 1$ incorrect) + self-<br>reported OD    | 0.78<br>(CI95% 0.67–0.88) | 0.94<br>(CI95% 0.85–1)    | 0.96<br>(CI95% 0.91–1)    | 0.7<br>(CI95% 0.6–0.8)    | 0.87<br>(CI95% 0.82–0.93) |
| 4-SDOIT<br>(OD $\geq 2$ incorrect)                           | 0.42<br>(CI95% 0.3–0.53)  | 1<br>(CI95% 1–1)          | 1<br>(CI95% 1–1)          | 0.48<br>(CI95% 0.43–0.53) | 0.72<br>(CI95% 0.65–0.77) |
| 4-SDOIT<br>(OD $\geq 2$ incorrect) + self-<br>reported OD    | 0.64<br>(CI95% 0.52–0.75) | 1<br>(CI95% 1–1)          | 1<br>(CI95% 1–1)          | 0.6<br>(CI95% 0.52–0.68)  | 0.82<br>(CI95% 0.76–0.88) |

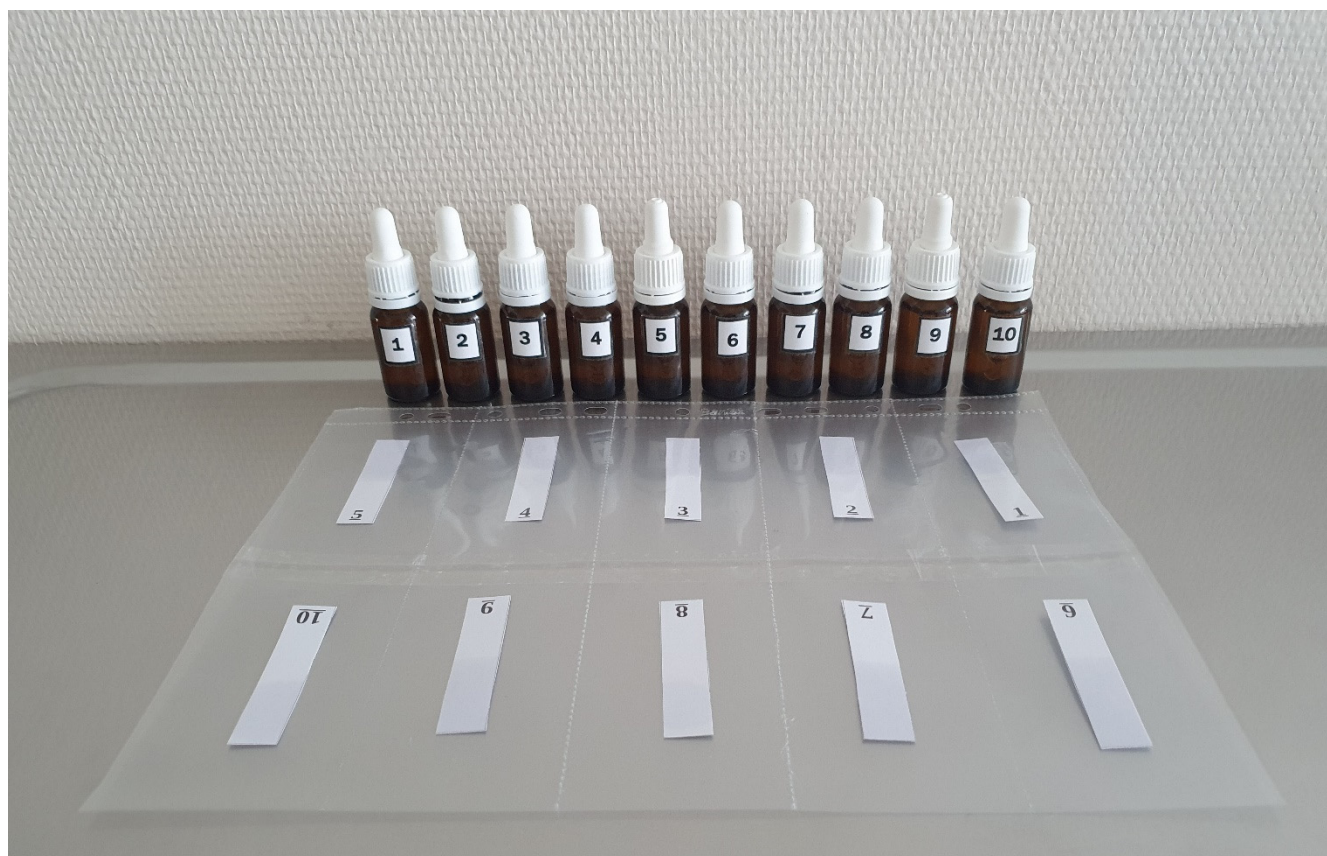

**Figure S1.** SDOIT test kit example: (A) 10 disposable test paper strips numbered 1 to 10 enclosed in plastic covers; (B) Odorants (commercially available cinnamon, mint, lemon, coffee, clove, rose, anise and camphor oil, and deionised water, numbered 1 to 10) in dropper bottles.
